# Supplementary material for: Comparative Study of Transcriptome in the Hearts Isolated from Mice, Rats, and Humans
Source: MDPI journal article supplement (doi:10.3390/biom12060859), 2022-06-20
Supplement: s1 [file s1]

**Supplementary Table S1.** Correlation of transcriptomes among species by cardiac regions, ordered from highest to lowest Spearman's correlation coefficient.

| <b>Animal species</b> | <b>Paired species</b> | <b>Cardiac region</b> | <b>Correlation coefficient</b> |
|-----------------------|-----------------------|-----------------------|--------------------------------|
| Mouse                 | Rat                   | LA                    | 0.627                          |
| Mouse                 | Rat                   | V                     | 0.617                          |
| Mouse                 | Rat                   | SA                    | 0.609                          |
| Human                 | Mouse                 | V                     | 0.580                          |
| Human                 | Rat                   | V                     | 0.573                          |
| Human                 | Rat                   | LA                    | 0.571                          |
| Human                 | Mouse                 | LA                    | 0.557                          |
| Human                 | Rat                   | SA                    | 0.553                          |
| Human                 | Mouse                 | SA                    | 0.532                          |
