# Supplementary material for: Comparative Study of Transcriptome in the Hearts Isolated from Mice, Rats, and Humans
Source: Biomolecules. 2022 Jun 20;12(6):859. doi: 10.3390/biom12060859 (PMC9221511; doi:10.3390/biom12060859)
Supplement: Supplementary file 1 [file biomolecules-12-00859-s001.zip]

Archive with 5 entries (5 files):
- Supplementary Figures.pdf
- Supplementary File S1.xlsx
- Supplementary File S2.xlsx
- Supplementary File S3.xlsx
- Supplementary Table S1.pdf
