# Supplementary material for: Comparative Study of Transcriptome in the Hearts Isolated from Mice, Rats, and Humans
Source: Biomolecules. 2022 Jun 20;12(6):859. doi: 10.3390/biom12060859 (PMC9221511; doi:10.3390/biom12060859)
Supplement: Supplementary file 1 [file biomolecules-12-00859-s001.zip › Supplementary File S1.xlsx]

## Sheet: transcription factors in SA
Supplementary File S1
The genes selected by the specificity measure (SPM) values and analysis of variance that correspond to transcription factors among the sinoatrial node (SA)-specific genes.
The transcription factors corresponding to each space in the Venn diagram in Figure 3C are indicated with their SPM values.
only Human SA specific		only mouse SA specific		only rat SA specific		SA specific (mouse ∩rat)			SA specific (mouse ∩human)			SA specific (mouse ∩ human ∩ rat)
SPM	Gene name	SPM	Gene name	SPM	Gene name	SPM (mouse)	SPM (rat)	Gene name	SPM (mouse)	SPM (human)	Gene name	SPM (mouse)	SPM (human)	SPM (rat)	Gene name
0.753143	IKZF1	0.673164	TBX3	0.760372	ALX3	0.604356	0.760781	GSC	0.754655	0.852675	ISL1	0.731594	0.907385	0.78727	SHOX2
0.738132	NR4A2	0.63988	MYCL	0.759685	CSRNP3	0.609478	0.64032	ESR1	0.601705	0.786455	HOXA4	0.60294	0.844787	0.756397	HOXA2
0.724909	BNC1	0.628317	FOS	0.74198	OVOL3	0.620075	0.63138	TBX5	0.618049	0.764783	HOXD4
0.698351	FOXC1	0.621556	NFATC4	0.68603	LEF1	0.608077	0.623439	HOXB4	0.611062	0.698911	TBX18
		0.619407	TBX1	0.67493	NFE2	0.616867	0.621378	PITX2	0.633505	0.697866	AEBP1
		0.61703	RFX2	0.65806	EMX2	0.617373	0.615913	SOX5
		0.616812	HOXC6	0.657048	ZFHX4
		0.616069	NACC2	0.65693	OSR1
		0.61191	NR1H3	0.656815	PRRX1
		0.610039	SMARCD3	0.648605	TBX4
		0.609804	HOXB5	0.644204	BHLHE41
		0.609507	CREB3L2	0.641029	NR4A3
		0.609264	HOXD8	0.638464	SIX1
		0.608246	ZFP870	0.621024	HOXD9
		0.607583	NDN	0.614511	SIX4
		0.606891	TSC22D4
		0.604142	ATOH8
		0.603606	CEBPA
		0.603577	SREBF1
		0.603502	MLXIPL
		0.603306	HOXA7
		0.602615	RFXANK
		0.602066	ZFP94
		0.601298	ZFP747
		0.60109	POU6F1
		0.600932	ZFP941
		0.599736	TRP63
		0.599408	FOXP2
		0.599107	ZFP420
		0.598971	GRHL1
		0.598969	ZFP523
		0.598882	ZFP672
		0.598558	CC2D1A
		0.598535	MYEF2
		0.598375	SMARCD2
		0.597428	OSR2
		0.597224	ZFP738
		0.597024	PPARG
		0.596585	PREB
		0.596255	TGIF1
		0.595523	NRF1
		0.595395	ZFP41
		0.595393	ZKSCAN6
		0.595159	ZFP212
		0.594907	ZFP691
		0.594753	JUNB
		0.594331	SATB1
		0.594149	CREB3
		0.593856	RUNX1T1
		0.593812	SOX17
		0.593777	NR1H4
		0.593444	ZSCAN12
		0.593435	ZHX3
		0.593288	VDR
		0.593221	ZFP219
		0.593033	TWIST1
		0.592756	TEF
		0.592511	RELA
