# Supplementary material for: Comparative Study of Transcriptome in the Hearts Isolated from Mice, Rats, and Humans
Source: Biomolecules. 2022 Jun 20;12(6):859. doi: 10.3390/biom12060859 (PMC9221511; doi:10.3390/biom12060859)
Supplement: Supplementary file 1 [file biomolecules-12-00859-s001.zip › Supplementary File S2.xlsx]

## Sheet: region and animal specific GO
Supplementary File S2
Significant, heart region- and species-specific gene ontology
geneRatio indicates ratio of specific genes that are annotated in a term. BgRatio indicates ratio of all genes that are annotated in this term.
From these ratios, a statistical test is performed to determine whether the corresponding gene clusters are significantly grouped or not. The P-values and adjusted P-values and Q-values of the test results are displayed. Within the main manuscript, the adjusted P value is used as the statistical criterion.
LA; left atrium, V; ventricle; SA; sinoatrial node
LA and human specific ontology
	ID	Description	GeneRatio	BgRatio	p-value	p.adjust	q-value	geneID	number of genes
GO:0051393	GO:0051393	alpha-actinin binding	2/17	17/7408	0.000660643	0.0499822	0.0404221	ENSG00000120729/ENSG00000130037	2
GO:0042805	GO:0042805	actinin binding	2/17	23/7408	0.00121908	0.0499822	0.0404221	ENSG00000120729/ENSG00000130037	2
LA and rat specific ontology
	ID	Description	GeneRatio	BgRatio	p-value	p.adjust	q-value	geneID	number of genes
GO:0046943	GO:0046943	carboxylic acid transmembrane transporter activity	6/96	63/6484	0.000309789	0.0477983	0.0460471	ENSRNOG00000006653/ENSRNOG00000012876/ENSRNOG00000011016/ENSRNOG00000002948/ENSRNOG00000014311/ENSRNOG00000001765	6
GO:0005342	GO:0005342	organic acid transmembrane transporter activity	6/96	64/6484	0.000337797	0.0477983	0.0460471	ENSRNOG00000006653/ENSRNOG00000012876/ENSRNOG00000011016/ENSRNOG00000002948/ENSRNOG00000014311/ENSRNOG00000001765	6
LA and mouse specific ontology
	ID	Description	GeneRatio	BgRatio	p-value	p.adjust	q-value	geneID	number of genes
GO:0005539	GO:0005539	glycosaminoglycan binding	28/624	96/7375	2.69702e-09	1.69103e-06	1.6466e-06	ENSMUSG00000031825/ENSMUSG00000022665/ENSMUSG00000049001/ENSMUSG00000072115/ENSMUSG00000005087/ENSMUSG00000006958/ENSMUSG00000025784/ENSMUSG00000063564/ENSMUSG00000031849/ENSMUSG00000019997/ENSMUSG00000035258/ENSMUSG00000024501/ENSMUSG00000026814/ENSMUSG00000022523/ENSMUSG00000027208/ENSMUSG00000029816/ENSMUSG00000027239/ENSMUSG00000039542/ENSMUSG00000045287/ENSMUSG00000022231/ENSMUSG00000026249/…	28
GO:0048018	GO:0048018	receptor ligand activity	28/624	131/7375	3.32373e-06	0.00104199	0.00101461	ENSMUSG00000074063/ENSMUSG00000002308/ENSMUSG00000039004/ENSMUSG00000071005/ENSMUSG00000042340/ENSMUSG00000019997/ENSMUSG00000018920/ENSMUSG00000035000/ENSMUSG00000028289/ENSMUSG00000022523/ENSMUSG00000031137/ENSMUSG00000027208/ENSMUSG00000038508/ENSMUSG00000029816/ENSMUSG00000020053/ENSMUSG00000050335/ENSMUSG00000027239/ENSMUSG00000041120/ENSMUSG00000029019/ENSMUSG00000039481/ENSMUSG00000030727/…	28
GO:0030546	GO:0030546	signaling receptor activator activity	28/624	135/7375	6.15263e-06	0.00105197	0.00102433	ENSMUSG00000074063/ENSMUSG00000002308/ENSMUSG00000039004/ENSMUSG00000071005/ENSMUSG00000042340/ENSMUSG00000019997/ENSMUSG00000018920/ENSMUSG00000035000/ENSMUSG00000028289/ENSMUSG00000022523/ENSMUSG00000031137/ENSMUSG00000027208/ENSMUSG00000038508/ENSMUSG00000029816/ENSMUSG00000020053/ENSMUSG00000050335/ENSMUSG00000027239/ENSMUSG00000041120/ENSMUSG00000029019/ENSMUSG00000039481/ENSMUSG00000030727/…	28
GO:0030545	GO:0030545	receptor regulator activity	29/624	143/7375	6.71111e-06	0.00105197	0.00102433	ENSMUSG00000074063/ENSMUSG00000002308/ENSMUSG00000039004/ENSMUSG00000071005/ENSMUSG00000042340/ENSMUSG00000019997/ENSMUSG00000018920/ENSMUSG00000030772/ENSMUSG00000035000/ENSMUSG00000028289/ENSMUSG00000022523/ENSMUSG00000031137/ENSMUSG00000027208/ENSMUSG00000038508/ENSMUSG00000029816/ENSMUSG00000020053/ENSMUSG00000050335/ENSMUSG00000027239/ENSMUSG00000041120/ENSMUSG00000029019/ENSMUSG00000039481/…	29
GO:0005201	GO:0005201	extracellular matrix structural constituent	18/624	68/7375	8.7553e-06	0.00109791	0.00106907	ENSMUSG00000001435/ENSMUSG00000029661/ENSMUSG00000063564/ENSMUSG00000079465/ENSMUSG00000031849/ENSMUSG00000035258/ENSMUSG00000066842/ENSMUSG00000029675/ENSMUSG00000064080/ENSMUSG00000023046/ENSMUSG00000026639/ENSMUSG00000036446/ENSMUSG00000060572/ENSMUSG00000042436/ENSMUSG00000030116/ENSMUSG00000005397/ENSMUSG00000031558/ENSMUSG00000001930	18
GO:0008201	GO:0008201	heparin binding	18/624	71/7375	1.67763e-05	0.00175312	0.00170706	ENSMUSG00000031825/ENSMUSG00000022665/ENSMUSG00000049001/ENSMUSG00000072115/ENSMUSG00000006958/ENSMUSG00000025784/ENSMUSG00000063564/ENSMUSG00000031849/ENSMUSG00000019997/ENSMUSG00000035258/ENSMUSG00000022523/ENSMUSG00000027208/ENSMUSG00000029816/ENSMUSG00000027239/ENSMUSG00000039542/ENSMUSG00000045287/ENSMUSG00000026249/ENSMUSG00000031558	18
GO:0008083	GO:0008083	growth factor activity	15/624	53/7375	2.05802e-05	0.0018434	0.00179497	ENSMUSG00000074063/ENSMUSG00000002308/ENSMUSG00000039004/ENSMUSG00000019997/ENSMUSG00000022523/ENSMUSG00000031137/ENSMUSG00000027208/ENSMUSG00000038508/ENSMUSG00000020053/ENSMUSG00000027239/ENSMUSG00000039481/ENSMUSG00000030727/ENSMUSG00000002603/ENSMUSG00000021253/ENSMUSG00000001131	15
GO:0005518	GO:0005518	collagen binding	12/624	40/7375	7.39441e-05	0.00569797	0.00554826	ENSMUSG00000031849/ENSMUSG00000032431/ENSMUSG00000028111/ENSMUSG00000035258/ENSMUSG00000026674/ENSMUSG00000035000/ENSMUSG00000001507/ENSMUSG00000024529/ENSMUSG00000036446/ENSMUSG00000005397/ENSMUSG00000028600/ENSMUSG00000001930	12
GO:0001968	GO:0001968	fibronectin binding	8/624	19/7375	8.17891e-05	0.00569797	0.00554826	ENSMUSG00000022665/ENSMUSG00000031849/ENSMUSG00000019997/ENSMUSG00000028111/ENSMUSG00000023046/ENSMUSG00000001507/ENSMUSG00000060572/ENSMUSG00000031740	8
GO:1901681	GO:1901681	sulfur compound binding	24/624	126/7375	0.00011835	0.00742053	0.00722557	ENSMUSG00000031825/ENSMUSG00000022665/ENSMUSG00000049001/ENSMUSG00000026499/ENSMUSG00000072115/ENSMUSG00000006958/ENSMUSG00000025784/ENSMUSG00000063564/ENSMUSG00000031849/ENSMUSG00000019997/ENSMUSG00000035258/ENSMUSG00000024501/ENSMUSG00000022523/ENSMUSG00000027208/ENSMUSG00000029816/ENSMUSG00000027890/ENSMUSG00000038155/ENSMUSG00000027239/ENSMUSG00000039542/ENSMUSG00000045287/ENSMUSG00000022231/…	24
GO:0043394	GO:0043394	proteoglycan binding	7/624	18/7375	0.000416869	0.0237616	0.0231373	ENSMUSG00000006958/ENSMUSG00000031849/ENSMUSG00000028111/ENSMUSG00000029816/ENSMUSG00000005397/ENSMUSG00000022231/ENSMUSG00000031558	7
GO:0005520	GO:0005520	insulin-like growth factor binding	7/624	20/7375	0.000874049	0.045669	0.0444691	ENSMUSG00000024074/ENSMUSG00000019997/ENSMUSG00000006205/ENSMUSG00000029096/ENSMUSG00000017493/ENSMUSG00000023046/ENSMUSG00000025213	7
V and rat specific ontology
	ID	Description	GeneRatio	BgRatio	p-value	p.adjust	q-value	geneID	number of genes
GO:0004888	GO:0004888	transmembrane signaling receptor activity	25/221	241/6484	5.17668e-07	0.000221562	0.000206522	ENSRNOG00000014294/ENSRNOG00000013578/ENSRNOG00000042825/ENSRNOG00000001224/ENSRNOG00000025297/ENSRNOG00000000567/ENSRNOG00000018251/ENSRNOG00000003806/ENSRNOG00000009822/ENSRNOG00000029756/ENSRNOG00000002922/ENSRNOG00000015260/ENSRNOG00000037839/ENSRNOG00000005971/ENSRNOG00000049115/ENSRNOG00000016242/ENSRNOG00000019217/ENSRNOG00000019283/ENSRNOG00000020948/ENSRNOG00000018735/ENSRNOG00000004441/…	25
GO:0038023	GO:0038023	signaling receptor activity	27/221	294/6484	1.99596e-06	0.000284756	0.000265427	ENSRNOG00000014294/ENSRNOG00000013578/ENSRNOG00000010549/ENSRNOG00000042825/ENSRNOG00000001224/ENSRNOG00000025297/ENSRNOG00000000567/ENSRNOG00000018251/ENSRNOG00000003806/ENSRNOG00000009822/ENSRNOG00000029756/ENSRNOG00000002922/ENSRNOG00000015260/ENSRNOG00000037839/ENSRNOG00000005971/ENSRNOG00000049115/ENSRNOG00000016242/ENSRNOG00000019217/ENSRNOG00000022859/ENSRNOG00000019283/ENSRNOG00000020948/…	27
GO:0060089	GO:0060089	molecular transducer activity	27/221	294/6484	1.99596e-06	0.000284756	0.000265427	ENSRNOG00000014294/ENSRNOG00000013578/ENSRNOG00000010549/ENSRNOG00000042825/ENSRNOG00000001224/ENSRNOG00000025297/ENSRNOG00000000567/ENSRNOG00000018251/ENSRNOG00000003806/ENSRNOG00000009822/ENSRNOG00000029756/ENSRNOG00000002922/ENSRNOG00000015260/ENSRNOG00000037839/ENSRNOG00000005971/ENSRNOG00000049115/ENSRNOG00000016242/ENSRNOG00000019217/ENSRNOG00000022859/ENSRNOG00000019283/ENSRNOG00000020948/…	27
GO:0004930	GO:0004930	G protein-coupled receptor activity	13/221	94/6484	1.53625e-05	0.00164378	0.0015322	ENSRNOG00000025297/ENSRNOG00000003806/ENSRNOG00000029756/ENSRNOG00000002922/ENSRNOG00000015260/ENSRNOG00000037839/ENSRNOG00000005971/ENSRNOG00000049115/ENSRNOG00000016242/ENSRNOG00000019217/ENSRNOG00000019283/ENSRNOG00000020948/ENSRNOG00000016362	13
V and mouse specific ontology
	ID	Description	GeneRatio	BgRatio	p-value	p.adjust	q-value	geneID	number of genes
GO:0016491	GO:0016491	oxidoreductase activity	68/632	350/7375	4.7209e-11	2.96472e-08	2.78285e-08	ENSMUSG00000002661/ENSMUSG00000020648/ENSMUSG00000028621/ENSMUSG00000021102/ENSMUSG00000033624/ENSMUSG00000026003/ENSMUSG00000029545/ENSMUSG00000018574/ENSMUSG00000020777/ENSMUSG00000028138/ENSMUSG00000020629/ENSMUSG00000063558/ENSMUSG00000043262/ENSMUSG00000020988/ENSMUSG00000027187/ENSMUSG00000034203/ENSMUSG00000042148/ENSMUSG00000009876/ENSMUSG00000000088/ENSMUSG00000074218/ENSMUSG00000025488/…	68
GO:0009055	GO:0009055	electron transfer activity	18/632	50/7375	6.4625e-08	2.02922e-05	1.90474e-05	ENSMUSG00000021102/ENSMUSG00000063558/ENSMUSG00000042148/ENSMUSG00000009876/ENSMUSG00000000088/ENSMUSG00000074218/ENSMUSG00000025488/ENSMUSG00000022551/ENSMUSG00000032314/ENSMUSG00000004610/ENSMUSG00000027809/ENSMUSG00000014294/ENSMUSG00000023089/ENSMUSG00000005510/ENSMUSG00000021764/ENSMUSG00000026820/ENSMUSG00000009863/ENSMUSG00000058076	18
GO:0016627	GO:0016627	oxidoreductase activity, acting on the CH-CH group of donors	13/632	40/7375	1.62452e-05	0.00340067	0.00319204	ENSMUSG00000020648/ENSMUSG00000026003/ENSMUSG00000029545/ENSMUSG00000018574/ENSMUSG00000020777/ENSMUSG00000022742/ENSMUSG00000026853/ENSMUSG00000028223/ENSMUSG00000003809/ENSMUSG00000031708/ENSMUSG00000027332/ENSMUSG00000009863/ENSMUSG00000058076	13
GO:0016835	GO:0016835	carbon-oxygen lyase activity	13/632	46/7375	8.48402e-05	0.0133199	0.0125028	ENSMUSG00000022477/ENSMUSG00000010911/ENSMUSG00000027371/ENSMUSG00000038526/ENSMUSG00000000805/ENSMUSG00000039063/ENSMUSG00000025465/ENSMUSG00000060600/ENSMUSG00000026526/ENSMUSG00000024507/ENSMUSG00000032293/ENSMUSG00000034206/ENSMUSG00000032067	13
GO:0005504	GO:0005504	fatty acid binding	8/632	21/7375	0.000206633	0.0259531	0.0243609	ENSMUSG00000020777/ENSMUSG00000028138/ENSMUSG00000002944/ENSMUSG00000000340/ENSMUSG00000028773/ENSMUSG00000020857/ENSMUSG00000000440/ENSMUSG00000037062	8
GO:0051393	GO:0051393	alpha-actinin binding	7/632	17/7375	0.000297348	0.0302749	0.0284176	ENSMUSG00000028273/ENSMUSG00000020067/ENSMUSG00000051331/ENSMUSG00000045534/ENSMUSG00000049134/ENSMUSG00000000440/ENSMUSG00000024471	7
GO:0033293	GO:0033293	monocarboxylic acid binding	9/632	28/7375	0.000366925	0.0302749	0.0284176	ENSMUSG00000020777/ENSMUSG00000028138/ENSMUSG00000002944/ENSMUSG00000000340/ENSMUSG00000028773/ENSMUSG00000020857/ENSMUSG00000000440/ENSMUSG00000015846/ENSMUSG00000037062	9
GO:0016836	GO:0016836	hydro-lyase activity	11/632	40/7375	0.000385667	0.0302749	0.0284176	ENSMUSG00000022477/ENSMUSG00000010911/ENSMUSG00000027371/ENSMUSG00000038526/ENSMUSG00000000805/ENSMUSG00000039063/ENSMUSG00000025465/ENSMUSG00000060600/ENSMUSG00000026526/ENSMUSG00000024507/ENSMUSG00000032293	11
GO:0043177	GO:0043177	organic acid binding	12/632	48/7375	0.000552028	0.033236	0.031197	ENSMUSG00000002944/ENSMUSG00000000340/ENSMUSG00000031987/ENSMUSG00000035105/ENSMUSG00000028773/ENSMUSG00000002769/ENSMUSG00000069919/ENSMUSG00000018906/ENSMUSG00000000440/ENSMUSG00000015846/ENSMUSG00000021313/ENSMUSG00000025403	12
GO:0042805	GO:0042805	actinin binding	8/632	24/7375	0.000592529	0.033236	0.031197	ENSMUSG00000028273/ENSMUSG00000020067/ENSMUSG00000036718/ENSMUSG00000051331/ENSMUSG00000045534/ENSMUSG00000049134/ENSMUSG00000000440/ENSMUSG00000024471	8
GO:0016614	GO:0016614	oxidoreductase activity, acting on CH-OH group of donors	14/632	62/7375	0.000602007	0.033236	0.031197	ENSMUSG00000028138/ENSMUSG00000043262/ENSMUSG00000020988/ENSMUSG00000066026/ENSMUSG00000022210/ENSMUSG00000073422/ENSMUSG00000025260/ENSMUSG00000027984/ENSMUSG00000024507/ENSMUSG00000030541/ENSMUSG00000063229/ENSMUSG00000031958/ENSMUSG00000020321/ENSMUSG00000027227	14
GO:0016829	GO:0016829	lyase activity	20/632	108/7375	0.000737878	0.033236	0.031197	ENSMUSG00000022477/ENSMUSG00000005580/ENSMUSG00000010911/ENSMUSG00000027371/ENSMUSG00000038526/ENSMUSG00000000805/ENSMUSG00000040213/ENSMUSG00000025545/ENSMUSG00000039063/ENSMUSG00000025465/ENSMUSG00000060600/ENSMUSG00000026526/ENSMUSG00000024507/ENSMUSG00000032293/ENSMUSG00000026688/ENSMUSG00000074064/ENSMUSG00000034206/ENSMUSG00000026820/ENSMUSG00000032067/ENSMUSG00000025403	20
GO:0004129	GO:0004129	cytochrome-c oxidase activity	5/632	10/7375	0.000795967	0.033236	0.031197	ENSMUSG00000042148/ENSMUSG00000009876/ENSMUSG00000000088/ENSMUSG00000074218/ENSMUSG00000025488	5
GO:0015002	GO:0015002	heme-copper terminal oxidase activity	5/632	10/7375	0.000795967	0.033236	0.031197	ENSMUSG00000042148/ENSMUSG00000009876/ENSMUSG00000000088/ENSMUSG00000074218/ENSMUSG00000025488	5
GO:0016676	GO:0016676	oxidoreductase activity, acting on a heme group of donors, oxygen as acceptor	5/632	10/7375	0.000795967	0.033236	0.031197	ENSMUSG00000042148/ENSMUSG00000009876/ENSMUSG00000000088/ENSMUSG00000074218/ENSMUSG00000025488	5
GO:0016616	GO:0016616	oxidoreductase activity, acting on the CH-OH group of donors, NAD or NADP as acceptor	13/632	57/7375	0.000846776	0.033236	0.031197	ENSMUSG00000028138/ENSMUSG00000043262/ENSMUSG00000066026/ENSMUSG00000022210/ENSMUSG00000073422/ENSMUSG00000025260/ENSMUSG00000027984/ENSMUSG00000024507/ENSMUSG00000030541/ENSMUSG00000063229/ENSMUSG00000031958/ENSMUSG00000020321/ENSMUSG00000027227	13
GO:0016675	GO:0016675	oxidoreductase activity, acting on a heme group of donors	5/632	11/7375	0.00135692	0.04955	0.0465102	ENSMUSG00000042148/ENSMUSG00000009876/ENSMUSG00000000088/ENSMUSG00000074218/ENSMUSG00000025488	5
GO:0008374	GO:0008374	O-acyltransferase activity	8/632	27/7375	0.00142022	0.04955	0.0465102	ENSMUSG00000029314/ENSMUSG00000032540/ENSMUSG00000078937/ENSMUSG00000028607/ENSMUSG00000026853/ENSMUSG00000030747/ENSMUSG00000031985/ENSMUSG00000022525	8
SA and mouse specific ontology
	ID	Description	GeneRatio	BgRatio	p-value	p.adjust	q-value	geneID	number of genes
GO:0005215	GO:0005215	transporter activity	106/1041	440/7375	5.62758e-09	3.79861e-06	3.54241e-06	ENSMUSG00000001082/ENSMUSG00000064267/ENSMUSG00000028655/ENSMUSG00000042616/ENSMUSG00000061306/ENSMUSG00000027463/ENSMUSG00000046329/ENSMUSG00000009035/ENSMUSG00000024130/ENSMUSG00000035722/ENSMUSG00000020620/ENSMUSG00000042476/ENSMUSG00000055782/ENSMUSG00000032231/ENSMUSG00000024391/ENSMUSG00000046808/ENSMUSG00000020788/ENSMUSG00000013160/ENSMUSG00000039347/ENSMUSG00000024566/ENSMUSG00000024818/…	106
GO:0022857	GO:0022857	transmembrane transporter activity	96/1041	394/7375	1.71369e-08	5.78372e-06	5.39363e-06	ENSMUSG00000001082/ENSMUSG00000064267/ENSMUSG00000028655/ENSMUSG00000042616/ENSMUSG00000061306/ENSMUSG00000027463/ENSMUSG00000046329/ENSMUSG00000024130/ENSMUSG00000035722/ENSMUSG00000020620/ENSMUSG00000042476/ENSMUSG00000055782/ENSMUSG00000032231/ENSMUSG00000020788/ENSMUSG00000013160/ENSMUSG00000039347/ENSMUSG00000024818/ENSMUSG00000038497/ENSMUSG00000050144/ENSMUSG00000049872/ENSMUSG00000039865/…	96
GO:0008509	GO:0008509	anion transmembrane transporter activity	49/1041	174/7375	7.93679e-07	0.000142845	0.000133211	ENSMUSG00000001082/ENSMUSG00000028655/ENSMUSG00000061306/ENSMUSG00000027463/ENSMUSG00000046329/ENSMUSG00000024818/ENSMUSG00000050144/ENSMUSG00000034908/ENSMUSG00000022949/ENSMUSG00000005949/ENSMUSG00000035699/ENSMUSG00000030768/ENSMUSG00000022560/ENSMUSG00000027953/ENSMUSG00000030082/ENSMUSG00000019802/ENSMUSG00000021474/ENSMUSG00000037344/ENSMUSG00000001436/ENSMUSG00000005089/ENSMUSG00000001918/…	49
GO:0015075	GO:0015075	ion transmembrane transporter activity	83/1041	353/7375	8.46491e-07	0.000142845	0.000133211	ENSMUSG00000001082/ENSMUSG00000064267/ENSMUSG00000028655/ENSMUSG00000061306/ENSMUSG00000027463/ENSMUSG00000046329/ENSMUSG00000032231/ENSMUSG00000020788/ENSMUSG00000013160/ENSMUSG00000039347/ENSMUSG00000024818/ENSMUSG00000038497/ENSMUSG00000050144/ENSMUSG00000049872/ENSMUSG00000034908/ENSMUSG00000037994/ENSMUSG00000024112/ENSMUSG00000022949/ENSMUSG00000064105/ENSMUSG00000005949/ENSMUSG00000035699/…	83
GO:0005201	GO:0005201	extracellular matrix structural constituent	25/1041	68/7375	2.51962e-06	0.000340148	0.000317206	ENSMUSG00000040690/ENSMUSG00000001435/ENSMUSG00000029661/ENSMUSG00000026043/ENSMUSG00000026837/ENSMUSG00000001119/ENSMUSG00000020241/ENSMUSG00000026574/ENSMUSG00000028108/ENSMUSG00000024909/ENSMUSG00000029675/ENSMUSG00000024053/ENSMUSG00000034687/ENSMUSG00000023046/ENSMUSG00000060572/ENSMUSG00000042436/ENSMUSG00000030116/ENSMUSG00000030605/ENSMUSG00000021806/ENSMUSG00000015354/ENSMUSG00000042453/…	25
GO:0015297	GO:0015297	antiporter activity	15/1041	31/7375	5.20244e-06	0.000585274	0.0005458	ENSMUSG00000038497/ENSMUSG00000037994/ENSMUSG00000026177/ENSMUSG00000001436/ENSMUSG00000020334/ENSMUSG00000032754/ENSMUSG00000025792/ENSMUSG00000031105/ENSMUSG00000023259/ENSMUSG00000060181/ENSMUSG00000028962/ENSMUSG00000006576/ENSMUSG00000028854/ENSMUSG00000037341/ENSMUSG00000039463	15
GO:0015298	GO:0015298	solute:cation antiporter activity	8/1041	11/7375	1.70531e-05	0.00164441	0.0015335	ENSMUSG00000038497/ENSMUSG00000037994/ENSMUSG00000026177/ENSMUSG00000020334/ENSMUSG00000032754/ENSMUSG00000028854/ENSMUSG00000037341/ENSMUSG00000039463	8
GO:0003779	GO:0003779	actin binding	52/1041	211/7375	2.5782e-05	0.00217536	0.00202864	ENSMUSG00000029060/ENSMUSG00000037679/ENSMUSG00000001864/ENSMUSG00000005417/ENSMUSG00000029095/ENSMUSG00000025026/ENSMUSG00000036777/ENSMUSG00000033420/ENSMUSG00000025432/ENSMUSG00000038827/ENSMUSG00000024381/ENSMUSG00000019261/ENSMUSG00000028656/ENSMUSG00000056737/ENSMUSG00000038816/ENSMUSG00000021097/ENSMUSG00000004665/ENSMUSG00000004530/ENSMUSG00000031827/ENSMUSG00000044700/ENSMUSG00000015932/…	52
GO:0022804	GO:0022804	active transmembrane transporter activity	33/1041	116/7375	3.97134e-05	0.0026919	0.00251034	ENSMUSG00000028655/ENSMUSG00000024130/ENSMUSG00000035722/ENSMUSG00000020620/ENSMUSG00000042476/ENSMUSG00000055782/ENSMUSG00000038497/ENSMUSG00000037994/ENSMUSG00000026177/ENSMUSG00000037344/ENSMUSG00000001436/ENSMUSG00000005089/ENSMUSG00000001918/ENSMUSG00000020334/ENSMUSG00000032754/ENSMUSG00000025792/ENSMUSG00000031105/ENSMUSG00000023259/ENSMUSG00000050822/ENSMUSG00000036298/ENSMUSG00000060181/…	33
GO:0022853	GO:0022853	active ion transmembrane transporter activity	23/1041	69/7375	3.988e-05	0.0026919	0.00251034	ENSMUSG00000028655/ENSMUSG00000038497/ENSMUSG00000037994/ENSMUSG00000026177/ENSMUSG00000037344/ENSMUSG00000001436/ENSMUSG00000005089/ENSMUSG00000020334/ENSMUSG00000032754/ENSMUSG00000023259/ENSMUSG00000050822/ENSMUSG00000036298/ENSMUSG00000028962/ENSMUSG00000006576/ENSMUSG00000030108/ENSMUSG00000028854/ENSMUSG00000037341/ENSMUSG00000039463/ENSMUSG00000030235/ENSMUSG00000032548/ENSMUSG00000030737/…	23
GO:0015291	GO:0015291	secondary active transmembrane transporter activity	26/1041	84/7375	5.46704e-05	0.00335478	0.00312851	ENSMUSG00000028655/ENSMUSG00000038497/ENSMUSG00000037994/ENSMUSG00000026177/ENSMUSG00000037344/ENSMUSG00000001436/ENSMUSG00000005089/ENSMUSG00000001918/ENSMUSG00000020334/ENSMUSG00000032754/ENSMUSG00000025792/ENSMUSG00000031105/ENSMUSG00000023259/ENSMUSG00000036298/ENSMUSG00000060181/ENSMUSG00000022464/ENSMUSG00000028962/ENSMUSG00000006576/ENSMUSG00000030108/ENSMUSG00000028854/ENSMUSG00000037341/…	26
GO:0015318	GO:0015318	inorganic molecular entity transmembrane transporter activity	65/1041	294/7375	0.000102072	0.00574156	0.00535432	ENSMUSG00000064267/ENSMUSG00000028655/ENSMUSG00000061306/ENSMUSG00000032231/ENSMUSG00000020788/ENSMUSG00000013160/ENSMUSG00000039347/ENSMUSG00000038497/ENSMUSG00000050144/ENSMUSG00000049872/ENSMUSG00000037994/ENSMUSG00000024112/ENSMUSG00000022949/ENSMUSG00000064105/ENSMUSG00000005949/ENSMUSG00000035699/ENSMUSG00000003378/ENSMUSG00000020331/ENSMUSG00000030102/ENSMUSG00000040724/ENSMUSG00000028931/…	65
GO:0008201	GO:0008201	heparin binding	22/1041	71/7375	0.00019775	0.00937283	0.00874067	ENSMUSG00000022665/ENSMUSG00000033453/ENSMUSG00000021835/ENSMUSG00000006958/ENSMUSG00000025784/ENSMUSG00000026837/ENSMUSG00000019997/ENSMUSG00000024909/ENSMUSG00000022523/ENSMUSG00000027208/ENSMUSG00000022816/ENSMUSG00000029816/ENSMUSG00000027195/ENSMUSG00000033825/ENSMUSG00000039542/ENSMUSG00000029718/ENSMUSG00000015354/ENSMUSG00000029838/ENSMUSG00000013236/ENSMUSG00000026580/ENSMUSG00000026249/…	22
GO:0005518	GO:0005518	collagen binding	15/1041	40/7375	0.000200469	0.00937283	0.00874067	ENSMUSG00000023328/ENSMUSG00000033420/ENSMUSG00000017446/ENSMUSG00000001119/ENSMUSG00000020241/ENSMUSG00000034220/ENSMUSG00000027195/ENSMUSG00000032243/ENSMUSG00000001507/ENSMUSG00000029718/ENSMUSG00000015354/ENSMUSG00000028600/ENSMUSG00000018593/ENSMUSG00000035493/ENSMUSG00000001930	15
GO:0038024	GO:0038024	cargo receptor activity	14/1041	36/7375	0.000208285	0.00937283	0.00874067	ENSMUSG00000035722/ENSMUSG00000042759/ENSMUSG00000008845/ENSMUSG00000044337/ENSMUSG00000005220/ENSMUSG00000037370/ENSMUSG00000032725/ENSMUSG00000033880/ENSMUSG00000040249/ENSMUSG00000026712/ENSMUSG00000012017/ENSMUSG00000006342/ENSMUSG00000014748/ENSMUSG00000032268	14
GO:0005539	GO:0005539	glycosaminoglycan binding	27/1041	96/7375	0.000240523	0.0101471	0.00946269	ENSMUSG00000022665/ENSMUSG00000033453/ENSMUSG00000021835/ENSMUSG00000006958/ENSMUSG00000025784/ENSMUSG00000026837/ENSMUSG00000019997/ENSMUSG00000024909/ENSMUSG00000027963/ENSMUSG00000022523/ENSMUSG00000027208/ENSMUSG00000022816/ENSMUSG00000029816/ENSMUSG00000027195/ENSMUSG00000033825/ENSMUSG00000039542/ENSMUSG00000029718/ENSMUSG00000015354/ENSMUSG00000079037/ENSMUSG00000029838/ENSMUSG00000013236/…	27
GO:0017171	GO:0017171	serine hydrolase activity	19/1041	59/7375	0.000306047	0.0121519	0.0113323	ENSMUSG00000039405/ENSMUSG00000061119/ENSMUSG00000023328/ENSMUSG00000032590/ENSMUSG00000038527/ENSMUSG00000024371/ENSMUSG00000061780/ENSMUSG00000005220/ENSMUSG00000026958/ENSMUSG00000027188/ENSMUSG00000000392/ENSMUSG00000030530/ENSMUSG00000090231/ENSMUSG00000022887/ENSMUSG00000033825/ENSMUSG00000035382/ENSMUSG00000042453/ENSMUSG00000017692/ENSMUSG00000032268	19
GO:0008236	GO:0008236	serine-type peptidase activity	18/1041	55/7375	0.000350345	0.0131379	0.0122518	ENSMUSG00000039405/ENSMUSG00000061119/ENSMUSG00000032590/ENSMUSG00000038527/ENSMUSG00000024371/ENSMUSG00000061780/ENSMUSG00000005220/ENSMUSG00000026958/ENSMUSG00000027188/ENSMUSG00000000392/ENSMUSG00000030530/ENSMUSG00000090231/ENSMUSG00000022887/ENSMUSG00000033825/ENSMUSG00000035382/ENSMUSG00000042453/ENSMUSG00000017692/ENSMUSG00000032268	18
GO:0051015	GO:0051015	actin filament binding	28/1041	104/7375	0.000410996	0.0142579	0.0132962	ENSMUSG00000001864/ENSMUSG00000005417/ENSMUSG00000029095/ENSMUSG00000025026/ENSMUSG00000033420/ENSMUSG00000025432/ENSMUSG00000038827/ENSMUSG00000024381/ENSMUSG00000019261/ENSMUSG00000056737/ENSMUSG00000038816/ENSMUSG00000021097/ENSMUSG00000004530/ENSMUSG00000031827/ENSMUSG00000044700/ENSMUSG00000015932/ENSMUSG00000020122/ENSMUSG00000022099/ENSMUSG00000021676/ENSMUSG00000022353/ENSMUSG00000020900/…	28
GO:0005342	GO:0005342	organic acid transmembrane transporter activity	20/1041	65/7375	0.000422455	0.0142579	0.0132962	ENSMUSG00000028655/ENSMUSG00000061306/ENSMUSG00000050144/ENSMUSG00000005949/ENSMUSG00000035699/ENSMUSG00000021474/ENSMUSG00000001436/ENSMUSG00000005089/ENSMUSG00000001918/ENSMUSG00000020334/ENSMUSG00000025792/ENSMUSG00000031105/ENSMUSG00000023259/ENSMUSG00000050822/ENSMUSG00000022464/ENSMUSG00000031170/ENSMUSG00000030108/ENSMUSG00000000958/ENSMUSG00000030235/ENSMUSG00000030737	20
GO:0008514	GO:0008514	organic anion transmembrane transporter activity	22/1041	75/7375	0.000468736	0.0150665	0.0140503	ENSMUSG00000001082/ENSMUSG00000028655/ENSMUSG00000027463/ENSMUSG00000046329/ENSMUSG00000005949/ENSMUSG00000022560/ENSMUSG00000021474/ENSMUSG00000001436/ENSMUSG00000005089/ENSMUSG00000001918/ENSMUSG00000025792/ENSMUSG00000031105/ENSMUSG00000023259/ENSMUSG00000028645/ENSMUSG00000018999/ENSMUSG00000031170/ENSMUSG00000006576/ENSMUSG00000030108/ENSMUSG00000030235/ENSMUSG00000032548/ENSMUSG00000030737/…	22
GO:0048018	GO:0048018	receptor ligand activity	33/1041	131/7375	0.000494066	0.0151588	0.0141364	ENSMUSG00000024810/ENSMUSG00000030790/ENSMUSG00000022098/ENSMUSG00000021835/ENSMUSG00000071005/ENSMUSG00000094686/ENSMUSG00000040759/ENSMUSG00000019997/ENSMUSG00000047822/ENSMUSG00000022523/ENSMUSG00000027208/ENSMUSG00000031380/ENSMUSG00000051379/ENSMUSG00000029816/ENSMUSG00000034708/ENSMUSG00000020053/ENSMUSG00000040329/ENSMUSG00000041324/ENSMUSG00000050335/ENSMUSG00000041120/ENSMUSG00000029838/…	33
GO:0005319	GO:0005319	lipid transporter activity	21/1041	71/7375	0.000554127	0.0162624	0.0151656	ENSMUSG00000028655/ENSMUSG00000024130/ENSMUSG00000035722/ENSMUSG00000020620/ENSMUSG00000042476/ENSMUSG00000055782/ENSMUSG00000024391/ENSMUSG00000046808/ENSMUSG00000024566/ENSMUSG00000005225/ENSMUSG00000035699/ENSMUSG00000011884/ENSMUSG00000021242/ENSMUSG00000042359/ENSMUSG00000017781/ENSMUSG00000050017/ENSMUSG00000005089/ENSMUSG00000001918/ENSMUSG00000028645/ENSMUSG00000030235/ENSMUSG00000030737	21
GO:0030546	GO:0030546	signaling receptor activator activity	33/1041	135/7375	0.000873333	0.0245625	0.0229058	ENSMUSG00000024810/ENSMUSG00000030790/ENSMUSG00000022098/ENSMUSG00000021835/ENSMUSG00000071005/ENSMUSG00000094686/ENSMUSG00000040759/ENSMUSG00000019997/ENSMUSG00000047822/ENSMUSG00000022523/ENSMUSG00000027208/ENSMUSG00000031380/ENSMUSG00000051379/ENSMUSG00000029816/ENSMUSG00000034708/ENSMUSG00000020053/ENSMUSG00000040329/ENSMUSG00000041324/ENSMUSG00000050335/ENSMUSG00000041120/ENSMUSG00000029838/…	33
GO:0046943	GO:0046943	carboxylic acid transmembrane transporter activity	19/1041	64/7375	0.000952944	0.0257295	0.0239941	ENSMUSG00000028655/ENSMUSG00000061306/ENSMUSG00000050144/ENSMUSG00000005949/ENSMUSG00000035699/ENSMUSG00000021474/ENSMUSG00000001436/ENSMUSG00000005089/ENSMUSG00000001918/ENSMUSG00000020334/ENSMUSG00000025792/ENSMUSG00000031105/ENSMUSG00000023259/ENSMUSG00000022464/ENSMUSG00000031170/ENSMUSG00000030108/ENSMUSG00000000958/ENSMUSG00000030235/ENSMUSG00000030737	19
GO:0004252	GO:0004252	serine-type endopeptidase activity	15/1041	46/7375	0.00111754	0.029013	0.0270562	ENSMUSG00000039405/ENSMUSG00000032590/ENSMUSG00000038527/ENSMUSG00000024371/ENSMUSG00000061780/ENSMUSG00000005220/ENSMUSG00000027188/ENSMUSG00000000392/ENSMUSG00000030530/ENSMUSG00000090231/ENSMUSG00000022887/ENSMUSG00000033825/ENSMUSG00000035382/ENSMUSG00000017692/ENSMUSG00000032268	15
GO:0005509	GO:0005509	calcium ion binding	47/1041	215/7375	0.00117073	0.0292682	0.0272942	ENSMUSG00000046329/ENSMUSG00000001864/ENSMUSG00000075254/ENSMUSG00000068115/ENSMUSG00000038312/ENSMUSG00000020891/ENSMUSG00000032231/ENSMUSG00000020788/ENSMUSG00000022098/ENSMUSG00000025575/ENSMUSG00000024942/ENSMUSG00000007122/ENSMUSG00000047216/ENSMUSG00000068740/ENSMUSG00000025784/ENSMUSG00000008153/ENSMUSG00000036766/ENSMUSG00000027188/ENSMUSG00000024909/ENSMUSG00000037370/ENSMUSG00000006276/…	47
GO:0030545	GO:0030545	receptor regulator activity	34/1041	143/7375	0.00123582	0.0297921	0.0277827	ENSMUSG00000024810/ENSMUSG00000030790/ENSMUSG00000022098/ENSMUSG00000021835/ENSMUSG00000071005/ENSMUSG00000094686/ENSMUSG00000040759/ENSMUSG00000019997/ENSMUSG00000030772/ENSMUSG00000047822/ENSMUSG00000022523/ENSMUSG00000027208/ENSMUSG00000031380/ENSMUSG00000051379/ENSMUSG00000029816/ENSMUSG00000034708/ENSMUSG00000020053/ENSMUSG00000040329/ENSMUSG00000041324/ENSMUSG00000050335/ENSMUSG00000041120/…	34
GO:0030020	GO:0030020	extracellular matrix structural constituent conferring tensile strength	7/1041	14/7375	0.00151473	0.0340815	0.0317828	ENSMUSG00000040690/ENSMUSG00000001435/ENSMUSG00000029661/ENSMUSG00000026043/ENSMUSG00000026837/ENSMUSG00000001119/ENSMUSG00000020241	7
GO:0042910	GO:0042910	xenobiotic transmembrane transporter activity	7/1041	14/7375	0.00151473	0.0340815	0.0317828	ENSMUSG00000024130/ENSMUSG00000020620/ENSMUSG00000042476/ENSMUSG00000001436/ENSMUSG00000050822/ENSMUSG00000028645/ENSMUSG00000030108	7
GO:0050839	GO:0050839	cell adhesion molecule binding	30/1041	124/7375	0.00174966	0.0380975	0.035528	ENSMUSG00000028041/ENSMUSG00000038816/ENSMUSG00000028076/ENSMUSG00000047216/ENSMUSG00000040690/ENSMUSG00000026043/ENSMUSG00000019997/ENSMUSG00000020122/ENSMUSG00000022505/ENSMUSG00000038235/ENSMUSG00000000392/ENSMUSG00000000127/ENSMUSG00000029816/ENSMUSG00000020053/ENSMUSG00000032243/ENSMUSG00000001507/ENSMUSG00000020758/ENSMUSG00000030605/ENSMUSG00000021910/ENSMUSG00000051790/ENSMUSG00000032336/…	30
GO:0140326	GO:0140326	ATPase-coupled intramembrane lipid transporter activity	6/1041	11/7375	0.00190771	0.0402407	0.0375266	ENSMUSG00000028655/ENSMUSG00000024130/ENSMUSG00000035722/ENSMUSG00000042476/ENSMUSG00000046808/ENSMUSG00000024566	6
