# Supplementary material for: Comparative Study of Transcriptome in the Hearts Isolated from Mice, Rats, and Humans
Source: Biomolecules. 2022 Jun 20;12(6):859. doi: 10.3390/biom12060859 (PMC9221511; doi:10.3390/biom12060859)
Supplement: Supplementary file 1 [file biomolecules-12-00859-s001.zip › Supplementary File S3.xlsx]

## Sheet: rat array data for 6 TFs
Supplementary File S3
Rat microarray raw intensity data for six transcription factors
LA; left atrium, LV; left ventricle, PA; pulmonary artery, PV; pulmonary vein, RV; right ventricle, SA; sinoatrial node
				LA				LV				PA				PV				RV			SA
Probe	Gene Symbol	Gene Name	ANOVA Q-value	1	2	3	4	1	2	3	4	1	2	3	4	1	2	3	4	1	2	4	1	2	3	4
A_44_P418245	Shox2	short stature homeobox 2	6.77765e-08	292.848	238.579	253.673	182.375	5.86497	26.842	13.0294	11.8163	32.964	34.6124	49.8687	34.7631	1925.31	2135.68	2049.37	2293.43	12.3788	37.0927	22.0193	2586.43	2992.75	2519.97	2756.45
A_44_P1010087	Hoxa2	homeo box A2	0.0359286	42.5437	10.9231	33.4235	11.9258	16.2035	13.3007	23.5872	11.5026	1324.47	1199.99	1314.24	1372.24	125.492	147.732	93.9066	108.903	29.8505	308.9	5.39371	171.557	154.948	132.184	221.209
A_44_P509917	Isl1	ISL LIM homeobox 1	0.31063	3.19496	21.9522	3.22741	5.67752	6.54818	8.31277	4.76849	10.9767	380.778	426.401	472.17	383.381	16.7407	26.5319	8.16195	31.3697	9.09926	9.92494	9.28467	11.3117	21.4178	10.0395	10.7581
A_42_P559462	Tbx18	T-box18	4.61432e-05	1654.98	1385.52	1898.75	1700.21	358.556	394.506	465.871	296.151	3580.57	5145.78	5575.87	5204.53	1204.18	1284.35	1245.62	1165.65	613.286	652.973	458.75	1349.32	851.348	1154.57	1381.45
A_44_P744401	Tbx5	T-box 5	7.95252e-05	340.987	187.5	257.963	207.645	80.2446	60.515	56.4199	30.2086	46.2411	91.9786	56.941	28.1697	245.19	377.265	270.733	288.736	82.076	65.2729	56.9056	370.619	297.886	267.182	164.248
A_64_P137823	Tbx3	T-box 3	0.00645863	832.794	435.407	696.228	1165.05	1568.78	1642.41	1695.39	1331.23	606.076	405.875	336.39	588.181	1044.57	1093.08	1326.28	927.832	1284.61	905.859	1509.4	1592.76	1602.17	1720.68	1869.42
